# Supplementary material for: Enhancing the Activity of a Self-Inducible Promoter in Escherichia coli through Saturation Mutation and High-Throughput Screening
Source: MDPI journal article supplement (doi:10.3390/fermentation9050468), 2023-05-13
Supplement: s1 [file s1]

# Enhancing the Activity of a Self-Inducible Promoter in *Escherichia coli* through Saturation Mutation and High-Throughput Screening

Jinyang Li <sup>1,†</sup>, Sheng Tong <sup>2,3,†</sup>, Farrukh Raza Amin <sup>2,3,4</sup>, Habiba Khalid <sup>2,3</sup>, Kai Chen <sup>5</sup>, Xiaoguang Zhao <sup>6</sup>, Jinling Cai <sup>1,\*</sup> and Demao Li <sup>2,3,\*</sup>

<sup>1</sup> Tianjin Key Laboratory of Brine Chemical Engineering and Resource Eco-Utilization, College of Chemical Engineering and Materials Science, Tianjin University of Science & Technology, Tianjin 300457, China; jinyangli1997@163.com

<sup>2</sup> Tianjin Key Laboratory for Industrial Biological System and Bioprocessing Engineering, Tianjin Institute of Industrial Biotechnology, Chinese Academy of Sciences, Tianjin 300308, China

<sup>3</sup> National Innovation Centre for Synthetic Biology, Tianjin 300308, China

<sup>4</sup> Department of Chemistry, COMSATS University Islamabad, Park Road, Tarlai Kalan, Islamabad 45550, Pakistan

<sup>5</sup> School of Chemical Engineering and Technology, Hebei University of Technology, Tianjin 300130, China

<sup>6</sup> School of Food Science and Technology, Dalian Polytechnic University, Dalian 116034, China

\* Correspondence: jinlingcai@tust.edu.cn (J.C.); li\_dm@tib.cas.cn (D.L.); Tel.: +86-(022)-84861993 (D.L.)

† These authors contributed equally to this work.

**Citation:** Li, J.; Tong, S.; Amin, F.R.; Khalid, H.; Chen, K.; Zhao, X.; Cai, J.; Li, D. Enhancing the Activity of a Self-Inducible Promoter in *Escherichia coli* through Saturation Mutation and High-Throughput Screening. *Fermentation* **2023**, *9*, 468. <https://doi.org/10.3390/fermentation9050468>

Academic Editors: Lihai Fan, Spiros Paramithiotis and Francesca Berini

Received: 30 March 2023

Revised: 7 May 2023

Accepted: 11 May 2023

Published: 13 May 2023

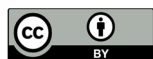

**Copyright:** © 2023 by the authors. Licensee MDPI, Basel, Switzerland. This article is an open access article distributed under the terms and conditions of the Creative Commons Attribution (CC BY) license (<https://creativecommons.org/licenses/by/4.0/>).

## Supplementary Materials

Table S1. All the primers in this experiment.

| Primers      | Sequence                                                                   |
|--------------|----------------------------------------------------------------------------|
| Verc-F       | AGCGGGTTTACGGATTTCTGAATGGAAGCTTGGATTCTCAC                                  |
| N20-R        | CTAGCTCTAAAACCGCGGTAGAGAAGTTTGACCGCTAAGATCTGACTCCATAACAGAG                 |
| N20-F        | TCTTAGCGGTCAAACCTTCTCTACCGCGTTTTAGAGCTAGAAATAGCAAGTTAAAATAAGG              |
| Verc-R       | GAAAGGCCAGTCTCAAGCGACAGGCCCATGGATTCTTCG                                    |
| UP-F         | AGAATCCATGGGCCTGTCGCTTGAGACTGGCCTTTCTG                                     |
| UP-R         | GATGATCGAGAGTAACTTGACGCGCATTACCTCGGTAGACAC                                 |
| DOWN-F       | TCTACCGAGGTAATGCGCTGCAAGTTACTCTCGATCATCCGG                                 |
| DOWN-R       | AGAATCCAAGCTTCCATTCAGAAATCCGTAAACCCGCTGC                                   |
| YrpoS-F      | CATCGGACCTTTTATTGTGCACAGA                                                  |
| YrpoS-R      | AATCCGTAAACCCGCTGCGTTAT                                                    |
| P-L          | CACGCCGAAACAAGCCCGCACTTCTGCTCTCC                                           |
| Model I      | AATTATTTCTAGAGGATTTGCCACAAGTATAAGCGGCAAATCCGGGTTNNNNNNGGAGAGCAGAAAGTGCGG   |
| Model II     | AATTATTTCTAGAGGATTTGCCACAAGTATANNNNNNNNNNNNNNNNNNNACGCCGGGAGAGCAGAAAGTGCGG |
| Model III    | AATTATTTCTAGAGNNNNNNNNNNNAGTATAAGCGGCAAATCCGGGTTACGCCGGGAGAGCAGAAAGTGCGG   |
| V-F          | CCTCTAGAAATAATTTTGTTTAACTTTAAGAAGGAGA                                      |
| V-R          | GCTTGTTTCGGCGTGGGTAT                                                       |
| YpET28a-Pfic | CATTAGGAAGCAGCCCAGTAGTAGG                                                  |
| EcoRI-rfp-F  | AAAGGATCCGAATTCCATATGGCGAGTAGCGAAGACG                                      |
| SalI-rfp-R   | AAAAAGCTTGTCGACTTAAGCACCGGTGGAGTGACG                                       |

Table S2. All the promoters screened in this experiment.

| Num | Sequence                                                 | $\sigma^S$ strength | $\sigma^{70}$ strength | $\sigma^S$ selectivity |
|-----|----------------------------------------------------------|---------------------|------------------------|------------------------|
| fic | CCGCACTTCTGCTCTCCCGGCGTAACCCGGATTTGCCGCTTATACTTGTGGCAAAT | 2981±314            | 7952±98                | 2.67                   |
| I-2 | CCGCACTTCTGCTCTCCCGGGACAACCCGGATTTGCCGCTTATACTTGTGGCAAAT | 3552±214            | 174±40                 | 0.05                   |

|       |                         |                   |             |                       |          |            |       |
|-------|-------------------------|-------------------|-------------|-----------------------|----------|------------|-------|
| I-15  | CCGCACTTCTGCTCTCC       | TAAGTA            | AACCCGGATTG | CCGCTTATACTTGTGGCAAAT | 2497±466 | 2095±472   | 0.84  |
| I-11  | CCGCACTTCTGCTCTCC       | GGGGGT            | AACCCGGATTG | CCGCTTATACTTGTGGCAAAT | 2669±92  | 2151±803   | 0.81  |
| I-3   | CCGCACTTCTGCTCTCC       | ACGAGT            | AACCCGGATTG | CCGCTTATACTTGTGGCAAAT | 2476±275 | 2744±720   | 1.11  |
| I-10  | CCGCACTTCTGCTCTCC       | ATAGCC            | AACCCGGATTG | CCGCTTATACTTGTGGCAAAT | 4655±553 | 2970±890   | 0.64  |
| I-1   | CCGCACTTCTGCTCTCC       | AAACGT            | AACCCGGATTG | CCGCTTATACTTGTGGCAAAT | 1806±252 | 3072±282   | 1.70  |
| I-5   | CCGCACTTCTGCTCTCC       | GGCCGG            | AACCCGGATTG | CCGCTTATACTTGTGGCAAAT | 2296±233 | 3208±243   | 1.40  |
| I-14  | CCGCACTTCTGCTCTCC       | TGAGCT            | AACCCGGATTG | CCGCTTATACTTGTGGCAAAT | 2339±242 | 3577±341   | 1.53  |
| I-12  | CCGCACTTCTGCTCTCC       | AAAGCA            | AACCCGGATTG | CCGCTTATACTTGTGGCAAAT | 2939±153 | 3681±570   | 1.25  |
| I-13  | CCGCACTTCTGCTCTCC       | CAAACG            | AACCCGGATTG | CCGCTTATACTTGTGGCAAAT | 1719±193 | 4112±791   | 2.39  |
| I-9   | CCGCACTTCTGCTCTCC       | CCCCAC            | AACCCGGATTG | CCGCTTATACTTGTGGCAAAT | 4299±196 | 9718±637   | 2.26  |
| I-6   | CCGCACTTCTGCTCTCC       | ACACAT            | AACCCGGATTG | CCGCTTATACTTGTGGCAAAT | 3045±204 | 12953±403  | 4.25  |
| I-4   | CCGCACTTCTGCTCTCC       | AAGCCA            | AACCCGGATTG | CCGCTTATACTTGTGGCAAAT | 4174±294 | 16691±534  | 4.00  |
| I-8   | CCGCACTTCTGCTCTCC       | GGGATA            | AACCCGGATTG | CCGCTTATACTTGTGGCAAAT | 3675±170 | 19755±187  | 5.38  |
| I-7   | CCGCACTTCTGCTCTCC       | AAGAAA            | AACCCGGATTG | CCGCTTATACTTGTGGCAAAT | 5227±373 | 21272±494  | 4.07  |
| I-20  | CCGCACTTCTGCTCTCC       | CAGCCA            | AACCCGGATTG | CCGCTTATACTTGTGGCAAAT | 3501±89  | 36845±2442 | 10.52 |
| I-19  | CCGCACTTCTGCTCTCC       | AGGCAG            | AACCCGGATTG | CCGCTTATACTTGTGGCAAAT | 3907±503 | 63212±1946 | 16.18 |
| I-17  | CCGCACTTCTGCTCTCC       | CTGCAA            | AACCCGGATTG | CCGCTTATACTTGTGGCAAAT | 4829±77  | 69070±4025 | 14.30 |
| I-16  | CCGCACTTCTGCTCTCC       | CTGGCA            | AACCCGGATTG | CCGCTTATACTTGTGGCAAAT | 9207±380 | 86809±1796 | 9.43  |
| I-18  | CCGCACTTCTGCTCTCC       | GAACAA            | AACCCGGATTG | CCGCTTATACTTGTGGCAAAT | 9211±371 | 98286±2962 | 10.67 |
| II-5  | CCGCACTTCTGCTCTCCCGGCGT | TAAAAGTGTTAATAAG  |             | TATACTTGTGGCAAAT      | 3467±290 | 247±150    | 0.07  |
| II-16 | CCGCACTTCTGCTCTCCCGGCGT | ACTCACTGTTTCGCGGG |             | TATACTTGTGGCAAAT      | 3613±477 | 545±348    | 0.15  |
| II-1  | CCGCACTTCTGCTCTCCCGGCGT | GACGCGAAGCCGCTGTG |             | TATACTTGTGGCAAAT      | 3576±353 | 824±171    | 0.23  |
| II-9  | CCGCACTTCTGCTCTCCCGGCGT | TGAGGAGATCGCAGAG  |             | TATACTTGTGGCAAAT      | 3019±33  | 1499±147   | 0.50  |
| II-15 | CCGCACTTCTGCTCTCCCGGCGT | CGGAGAAACGGAGGATA |             | TATACTTGTGGCAAAT      | 2477±120 | 1570±531   | 0.63  |
| II-8  | CCGCACTTCTGCTCTCCCGGCGT | TTCCATACCGATAGCTA |             | TATACTTGTGGCAAAT      | 2601±99  | 2116±504   | 0.81  |
| II-6  | CCGCACTTCTGCTCTCCCGGCGT | CACTAATTCAAGCACGT |             | TATACTTGTGGCAAAT      | 3426±18  | 2544±615   | 0.74  |
| II-7  | CCGCACTTCTGCTCTCCCGGCGT | AACAGATTGAGAGTCGC |             | TATACTTGTGGCAAAT      | 3481±401 | 2835±56    | 0.81  |
| II-2  | CCGCACTTCTGCTCTCCCGGCGT | TTAAACTATCTGTGCTT |             | TATACTTGTGGCAAAT      | 3969±91  | 5901±623   | 1.49  |
| II-3  | CCGCACTTCTGCTCTCCCGGCGT | CGGATACAAGTAGGATG |             | TATACTTGTGGCAAAT      | 5700±263 | 7069±2913  | 1.24  |
| II-12 | CCGCACTTCTGCTCTCCCGGCGT | TAAAGAAGAAGCTAACA |             | TATACTTGTGGCAAAT      | 6589±105 | 7128±251   | 1.08  |
| II-14 | CCGCACTTCTGCTCTCCCGGCGT | CGTCAGAACCTTTAGTT |             | TATACTTGTGGCAAAT      | 6680±719 | 8181±136   | 1.22  |

|        |                                   |                   |                     |           |             |       |
|--------|-----------------------------------|-------------------|---------------------|-----------|-------------|-------|
| II-22  | CCGCACTTCTGCTCTCCCGGCGT           | TCTCGACCAGTAAC    | TGCTATACTTGTGGCAAAT | 2209±234  | 10115±287   | 4.58  |
| II-4   | CCGCACTTCTGCTCTCCCGGCGT           | AAAAGAAACGCGGT    | TGCTATACTTGTGGCAAAT | 2355±533  | 11641±2116  | 4.94  |
| II-13  | CCGCACTTCTGCTCTCCCGGCGT           | ATAATACTATTGACAAC | TATACTTGTGGCAAAT    | 10575±661 | 12034±2187  | 1.14  |
| II-11  | CCGCACTTCTGCTCTCCCGGCGT           | AAAAGACGCGATAAC   | CGCTATACTTGTGGCAAAT | 4278±229  | 22330±800   | 5.22  |
| II-18  | CCGCACTTCTGCTCTCCCGGCGT           | GCTTCTTAGAATCGG   | CTATACTTGTGGCAAAT   | 7047±926  | 24917±924   | 3.54  |
| II-17  | CCGCACTTCTGCTCTCCCGGCGT           | ATTATATGTACGTGAT  | CTATACTTGTGGCAAAT   | 7616±290  | 39738±2376  | 5.22  |
| II-19  | CCGCACTTCTGCTCTCCCGGCGT           | TCATCGGAATATATAG  | CTATACTTGTGGCAAAT   | 4830±642  | 42147±4469  | 8.73  |
| II-24  | CCGCACTTCTGCTCTCCCGGCGT           | TAAACAAGAAGAGAGG  | CTATACTTGTGGCAAAT   | 4440±318  | 45767±2939  | 10.31 |
| II-10  | CCGCACTTCTGCTCTCCCGGCGT           | GTCGAGCTAAACATGG  | CTATACTTGTGGCAAAT   | 3708±317  | 50073±2943  | 13.50 |
| II-35  | CCGCACTTCTGCTCTCCCGGCGT           | GACTTGGGGGCTTAAG  | CTATACTTGTGGCAAAT   | 3916±141  | 52489±3599  | 13.40 |
| II-23  | CCGCACTTCTGCTCTCCCGGCGT           | CACACGAAGAAAGAGG  | CTATACTTGTGGCAAAT   | 8591±754  | 56431±4027  | 6.57  |
| II-25  | CCGCACTTCTGCTCTCCCGGCGT           | GTGGGGGAACCCGGT   | GTCTATACTTGTGGCAAAT | 6042±620  | 74336±5014  | 12.30 |
| II-30  | CCGCACTTCTGCTCTCCCGGCGT           | CCTAAGGAATAACCAT  | CTATACTTGTGGCAAAT   | 2930±247  | 75530±1397  | 25.77 |
| II-26  | CCGCACTTCTGCTCTCCCGGCGT           | GATCAAGCTAAAGGAAC | CTATACTTGTGGCAAAT   | 2535±300  | 77585±3829  | 30.60 |
| II-20  | CCGCACTTCTGCTCTCCCGGCGT           | CGCTCAACATTATCAT  | CTATACTTGTGGCAAAT   | 6153±978  | 79257±5797  | 12.88 |
| II-31  | CCGCACTTCTGCTCTCCCGGCGT           | GACATCACATAACGGAC | CTATACTTGTGGCAAAT   | 3393±586  | 93840±5936  | 27.66 |
| II-21  | CCGCACTTCTGCTCTCCCGGCGT           | CTCCGCGATAAATCAAC | CTATACTTGTGGCAAAT   | 7889±863  | 90895±4223  | 11.52 |
| II-29  | CCGCACTTCTGCTCTCCCGGCGT           | GGTGAGTGTGTGAATG  | CTATACTTGTGGCAAAT   | 7777±803  | 95237±5665  | 12.25 |
| II-27  | CCGCACTTCTGCTCTCCCGGCGT           | GCGGCTCCCGGCTAGAC | CTATACTTGTGGCAAAT   | 5139±544  | 96357±3205  | 18.75 |
| II-36  | CCGCACTTCTGCTCTCCCGGCGT           | TTACGACGAGATGAGT  | CTATACTTGTGGCAAAT   | 4342±160  | 103775±4274 | 23.90 |
| II-32  | CCGCACTTCTGCTCTCCCGGCGT           | TTCGCGAGCCTATGGAC | CTATACTTGTGGCAAAT   | 4023±157  | 109645±2351 | 27.25 |
| II-34  | CCGCACTTCTGCTCTCCCGGCGT           | GCTCACGCCAGTTCGT  | CTATACTTGTGGCAAAT   | 5499±114  | 116282±1097 | 21.15 |
| II-28  | CCGCACTTCTGCTCTCCCGGCGT           | ACGAACGAAATAGATAC | CTATACTTGTGGCAAAT   | 8171±250  | 137194±1322 | 16.79 |
| II-33  | CCGCACTTCTGCTCTCCCGGCGT           | CCC CGGAACCGCGCGT | CTATACTTGTGGCAAAT   | 4327±627  | 160515±3171 | 37.10 |
| III-2  | CCGCACTTCTGCTCTCCCGGCGTAACCCGGATT | TGCCGCTTATACT     | CAGGCAGCAT          | 2202±227  | 8075±211    | 3.67  |
| III-9  | CCGCACTTCTGCTCTCCCGGCGTAACCCGGATT | TGCCGCTTATACT     | CACCGTACAG          | 2060±38   | 10878±306   | 5.28  |
| III-1  | CCGCACTTCTGCTCTCCCGGCGTAACCCGGATT | TGCCGCTTATACT     | GAAACGAAAA          | 2443±77   | 17199±864   | 7.04  |
| III-10 | CCGCACTTCTGCTCTCCCGGCGTAACCCGGATT | TGCCGCTTATACT     | TAACAAATTI          | 2950±155  | 21191±1386  | 7.18  |
| III-4  | CCGCACTTCTGCTCTCCCGGCGTAACCCGGATT | TGCCGCTTATACT     | AAGTAAACAG          | 15071±539 | 21968±4461  | 1.46  |
| III-8  | CCGCACTTCTGCTCTCCCGGCGTAACCCGGATT | TGCCGCTTATACT     | TGAGTAAGCG          | 1984±256  | 22609±3765  | 11.40 |
| III-5  | CCGCACTTCTGCTCTCCCGGCGTAACCCGGATT | TGCCGCTTATACT     | CAGATAGCAC          | 1719±35   | 24270±975   | 14.12 |
| III-3  | CCGCACTTCTGCTCTCCCGGCGTAACCCGGATT | TGCCGCTTATACT     | CTTTCCTGG           | 2299±27   | 27959±4051  | 12.16 |

|        |                                                         |          |             |       |
|--------|---------------------------------------------------------|----------|-------------|-------|
| III-6  | CCGCACTTCTGCTCTCCCGGCGTAACCCGGATTGCGCGTTATACTGAAAGAACAG | 1927±121 | 33543±2135  | 17.40 |
| III-7  | CCGCACTTCTGCTCTCCCGGCGTAACCCGGATTGCGCGTTATACTAAAAAAGGTA | 2795±261 | 42266±4854  | 15.12 |
| III-16 | CCGCACTTCTGCTCTCCCGGCGTAACCCGGATTGCGCGTTATACTGTTAATTCCC | 3207±172 | 44320±1977  | 13.82 |
| III-17 | CCGCACTTCTGCTCTCCCGGCGTAACCCGGATTGCGCGTTATACTTAATGGGAAC | 3568±374 | 48473±3739  | 13.58 |
| III-20 | CCGCACTTCTGCTCTCCCGGCGTAACCCGGATTGCGCGTTATACTAGTATAGCTA | 6145±507 | 51348±2314  | 8.36  |
| III-13 | CCGCACTTCTGCTCTCCCGGCGTAACCCGGATTGCGCGTTATACTATATAAGAAA | 3865±240 | 57010±4153  | 14.75 |
| III-15 | CCGCACTTCTGCTCTCCCGGCGTAACCCGGATTGCGCGTTATACTATAAGAGATT | 3799±153 | 71351±1735  | 18.78 |
| III-18 | CCGCACTTCTGCTCTCCCGGCGTAACCCGGATTGCGCGTTATACTATAGACCGTA | 4093±345 | 78306±3422  | 19.13 |
| III-12 | CCGCACTTCTGCTCTCCCGGCGTAACCCGGATTGCGCGTTATACTTGAAATAGGA | 3129±238 | 115957±4813 | 37.06 |
| III-19 | CCGCACTTCTGCTCTCCCGGCGTAACCCGGATTGCGCGTTATACTAAAAAGTTCC | 4478±580 | 116684±3254 | 26.06 |
| III-11 | CCGCACTTCTGCTCTCCCGGCGTAACCCGGATTGCGCGTTATACTTGCAATGCCA | 4606±270 | 133063±3430 | 28.89 |
| III-14 | CCGCACTTCTGCTCTCCCGGCGTAACCCGGATTGCGCGTTATACTATAATAGATC | 3356±249 | 166863±2143 | 49.73 |

Note: yellow highlighted part is the mutation area.

Table S3. The promoter's improvement under stress conditions in other experiments.

| Promoter | Stress conditions                  | Improvement (than original media) | Reference |
|----------|------------------------------------|-----------------------------------|-----------|
| PgorES   | 10g/L acetic acid                  | 1-2×                              | [58]      |
| pssA     | high osmotic pressure (0.8 M NaCl) | 3.5×                              | [59]      |
| pspA     | high osmotic pressure (0.8 M NaCl) | 2.22×                             | [59]      |
| rodA     | high osmotic pressure (0.8 M NaCl) | 1.73×                             | [59]      |
| P21285   | high osmotic pressure (0.5 M NaCl) | 1.17×                             | [60]      |
| P191     | high osmotic pressure (0.5 M NaCl) | 1.11×                             | [60]      |

## References

58. Ling Gao; Xiaodan Wu; Chenyu Li; Xiaole Xia. Exploitation of strong constitutive and stress-driven promoters from *Acetobacter pasteurianus* for improving acetic acid tolerance. *Journal of Biotechnology*. 2022, 350, 24-30. doi:10.1016/j.jbiotec.2022.03.013.
58. Yafeng Song; Jonas M. Nikoloff; Gang Fu; Jingqi Chen; Qinggang Li; Nengzhong Xie; Ping Zheng; Jibin Sun; Dawei Zhang. Promoter Screening from *Bacillus subtilis* in Various Conditions Hunting for Synthetic Biology and Industrial Applications. *Plos One*. 2016, 11, e0158447. doi:10.1371/journal.pone.0158447.

60. Yang Wang; Qingtao Liu; Huanjiao Weng; Yanan Shi; Jian Chen; Guocheng Du; Zhen Kang. Construction of Synthetic Promoters by Assembling the Sigma Factor Binding -35 and -10 Boxes. *Biotechnology Journal*. 2019, 14, e1800298. doi:10.1002/biot.201800298.
